# Supplementary material for: Fast-Curing Geopolymer Foams with an Enhanced Pore Homogeneity Derived by Hydrogen Peroxide and Sodium Dodecyl Sulfate Surfactant
Source: MDPI journal article supplement (doi:10.3390/min12070821), 2022-06-28
Supplement: s1 [file s1]

Supplementary Materials

# Fast-Curing Geopolymer Foams with an Enhanced Pore Homogeneity Derived by Hydrogen Peroxide and Sodium Dodecyl Sulfate Surfactant

Kyung Won Kim <sup>1,2</sup>, Hyung Mi Lim <sup>1</sup>, Seog-Young Yoon <sup>2,\*</sup> and Hyunseok Ko <sup>3,\*</sup>

<sup>1</sup> Advanced Materials R&D Division, Korea Institute of Ceramic Engineering and Technology, Jinju 52851, Korea; kgw@kicet.re.kr (K.W.K.); lim@kicet.re.kr (H.M.L.)

<sup>2</sup> School of Materials Science and Engineering, Pusan National University, Busan 46241, Korea

<sup>3</sup> Center of Materials Digitalization, Korea Institute of Ceramic Engineering and Technology, Jinju 52851, Korea

\* Correspondence: sy3@pusan.ac.kr (S.-Y.Y.); hko@kicet.re.kr (H.K.)

**Table S1.** Formulation molar ratio of fast curing geopolymer discussed in previous study.

| Components | SiO <sub>2</sub> /Al <sub>2</sub> O <sub>3</sub> | Ca(OH) <sub>2</sub> /Al <sub>2</sub> O <sub>3</sub> | K <sub>2</sub> O/SiO <sub>2</sub> | H <sub>2</sub> O/K <sub>2</sub> O |
|------------|--------------------------------------------------|-----------------------------------------------------|-----------------------------------|-----------------------------------|
| ratio      | 4.2                                              | 0.2                                                 | 0.3                               | 9.4                               |

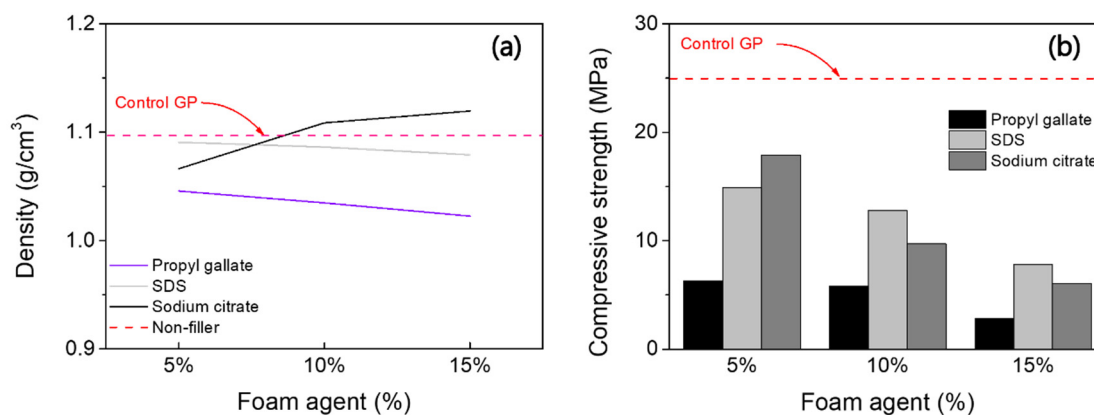

**Figure S1.** (a) Density of GP with varying foaming agent content, and (b) compressive strength as a function of the content of foaming agents with 3 types of foaming agents.

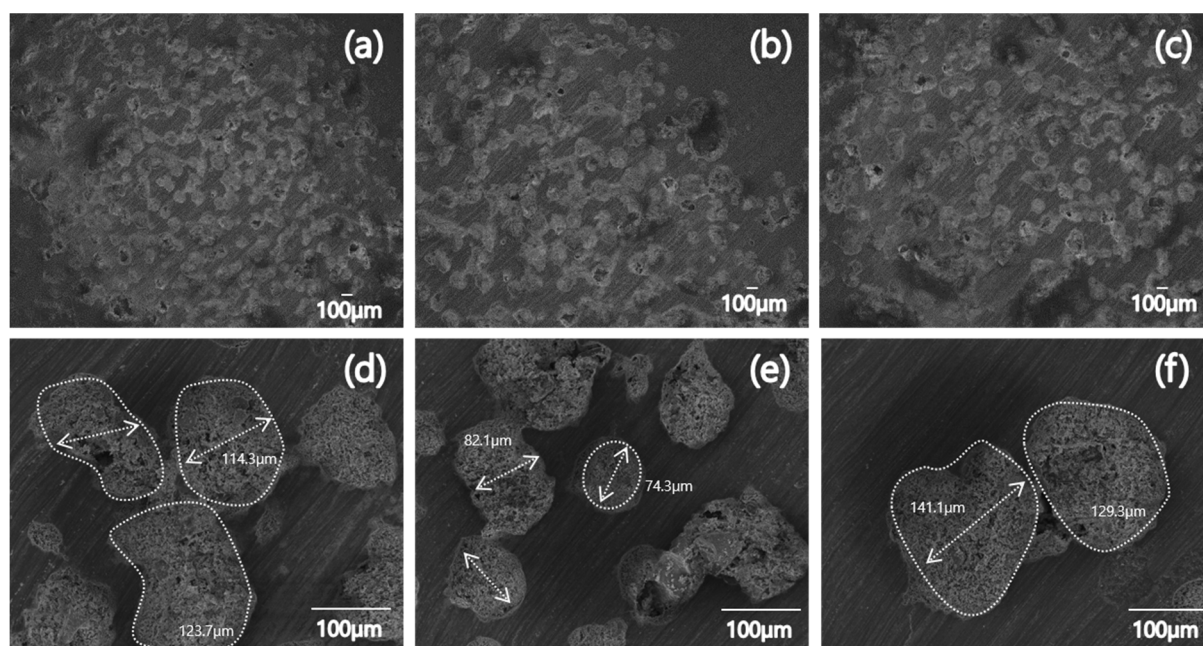

**Figure S2.** (a–c) and (d–f) show surfaces at different magnifications of the *HS* sample. The pore distribution and size due to the effect of adding a surfactant(SDS) can be visually estimated.

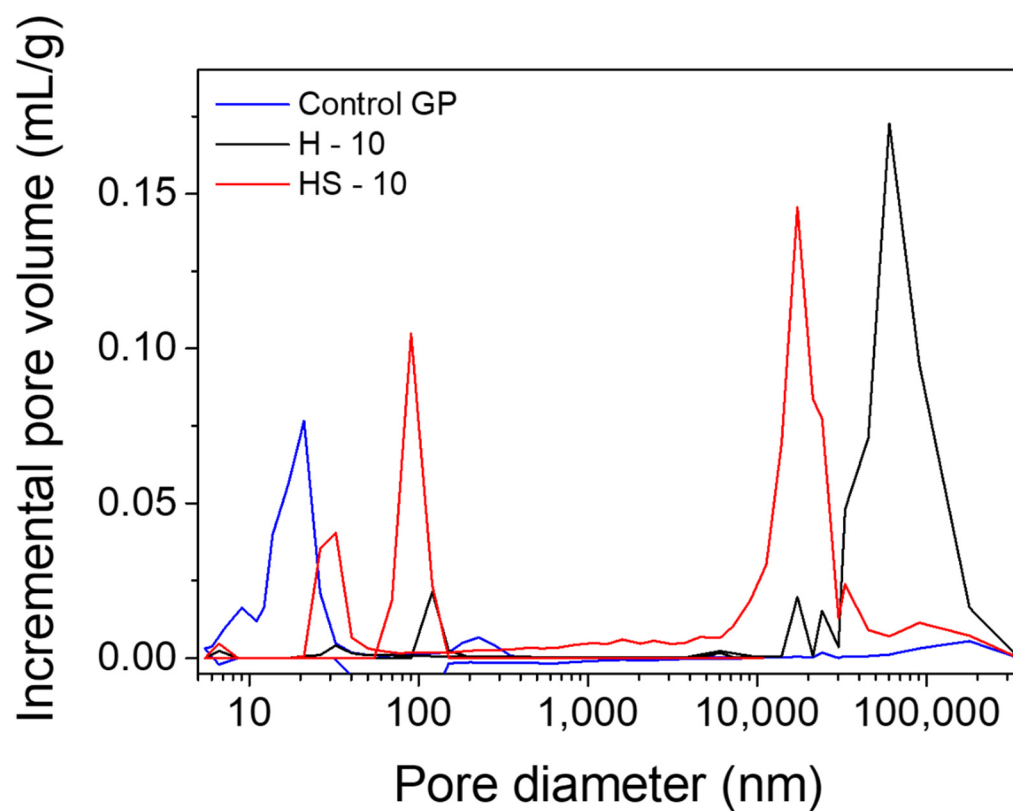

**Figure S3.** Mercury intrusion porosimetry test cumulative volume curve graph of Control GP, *H-10*, *HS-10*.
